# Supplementary material for: Competing endogenous network analysis identifies lncRNA Meg3 activates inflammatory damage in UVB induced murine skin lesion by sponging miR-93-5p/epiregulin axis
Source: publisher site journal article supplement (doi:10.18632/aging.102483), 2019-11-24
Supplement: Supplementary file [file aging-v11i22-102483-supplementary-material-SD2.pdf]

## SUPPLEMENTARY FIGURE

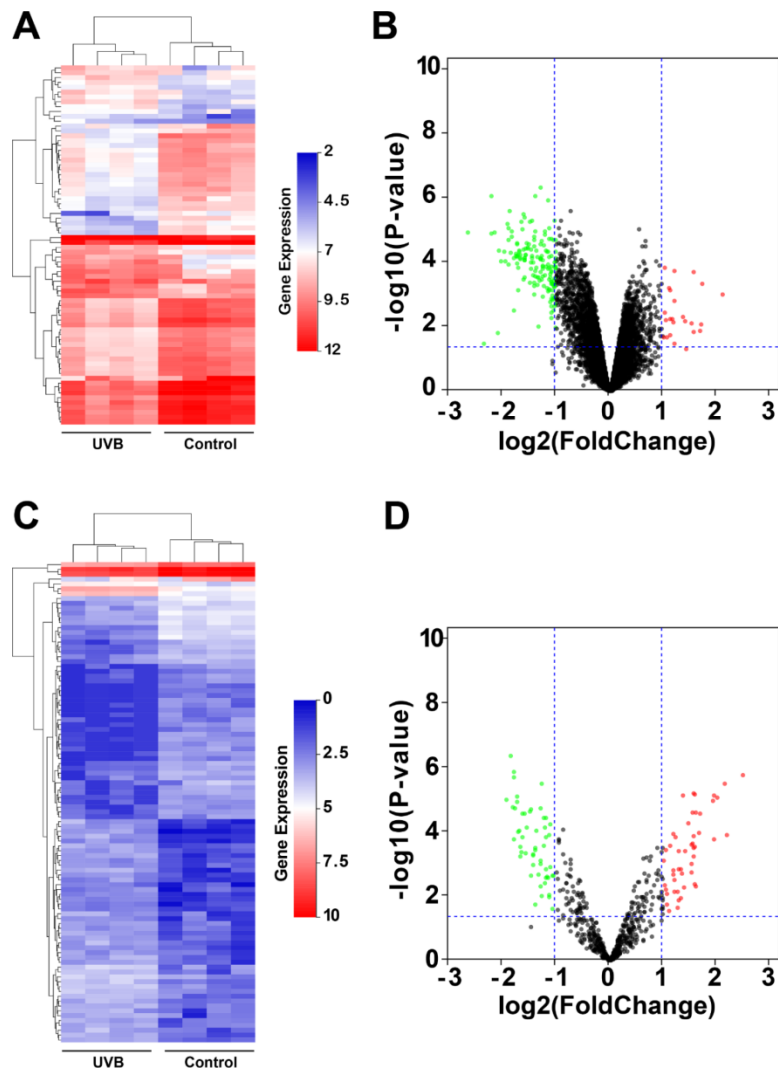

**Supplementary Figure 1. Bioinformatics analysis of mRNA and miRNA of murine skin samples after UVB irradiation.** (A) the cluster of all genes by Hierarchical clustering method; (B) Volcano plot of all detected genes by using the  $\text{Log}_2\text{FC}$  and  $-\text{Log}_{10}$  P-values as cut-off; (C) the cluster of all miRNAs by Hierarchical clustering method; (D) Volcano plot of all detected miRNAs by using the  $\text{Log}_2\text{FC}$  and  $-\text{Log}_{10}$  P-values as cut-off.
